# Supplementary material for: Structure–inhibition relationship of phenylethanoid glycosides on angiotensin-converting enzyme using ultra-performance liquid chromatography-tandem quadrupole mass spectrometry
Source: Royal Society of Chemistry journal article supplement (doi:10.1039/c5ra05027h), 2015-01-01
Supplement: c5ra05027h1.pdf [file c5ra05027h1.pdf]

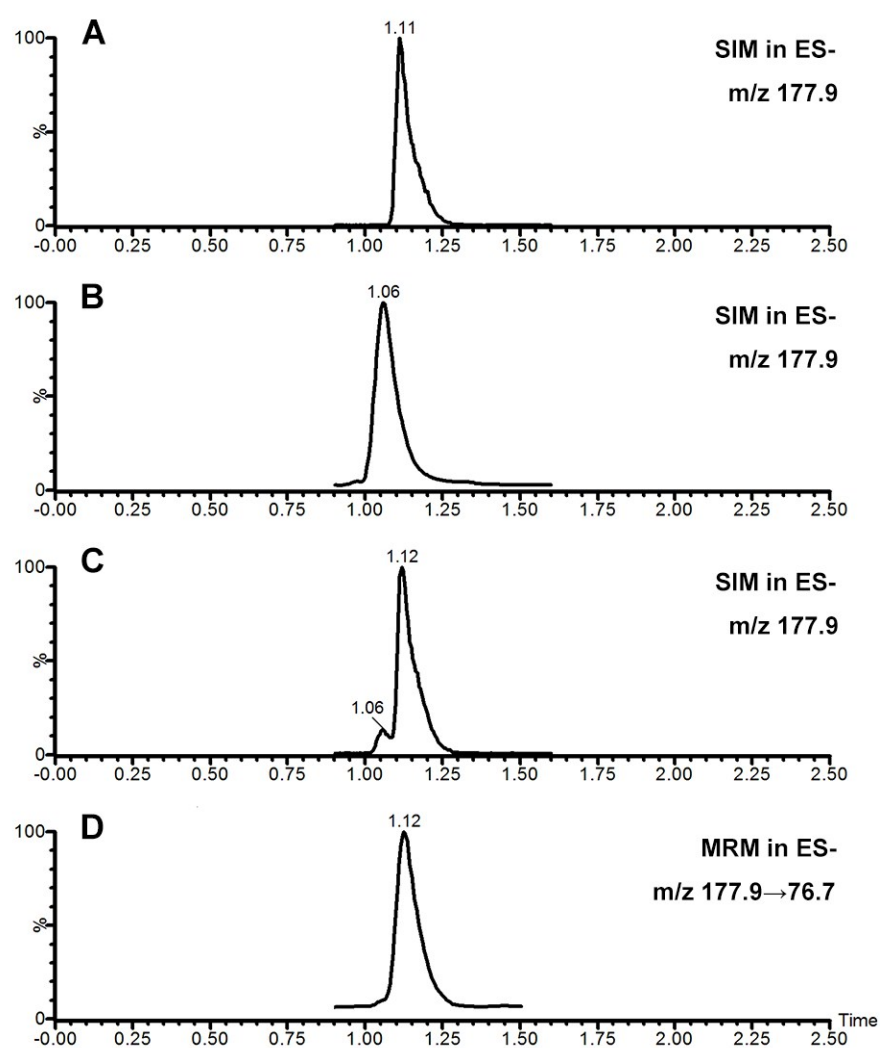

**Supplementary Fig. 1** UPLC-MS chromatograms in SIM scan mode of (A) HA, (B) caffeic acid, (C) the mixture of HA and caffeic acid, and (D) UPLC-MS/MS chromatogram of the mixture of HA and caffeic acid in MRM scan mode.

**Supplementary Table 1.** Comparisons of different assay methods for ACE activity.

| Method            | LOD (ng)           | Assay time<br>(min) | ACE used<br>(mU) | HHL used<br>(nM) | Specificity |
|-------------------|--------------------|---------------------|------------------|------------------|-------------|
| UPLC-MS/MS        | $3 \times 10^{-3}$ | 2.5                 | 1.0              | 3                | +++         |
| UPLC-MS           | $5 \times 10^{-3}$ | 2-3                 | 1.0              | 3                | ++          |
| HPLC-UV           | 8                  | > 15                | 5.0              | 608              | +           |
| Spectrophotometry | $5 \times 10^3$    | unequal             | 16.5             | 1398             | -           |

**Supplementary Table 2.** IC<sub>50</sub> values measured by UPLC-MS and UPLC-MS/MS

| Compound       | IC <sub>50</sub> (mM) |                         |
|----------------|-----------------------|-------------------------|
|                | UPLC-MS <sup>a</sup>  | UPLC-MS/MS <sup>b</sup> |
| Captopril      | $0.004 \pm 0.001$     | $0.002 \pm 0.000$       |
| Acteoside      | $2.86 \pm 0.10$       | $2.22 \pm 0.21$         |
| Isoacteoside   | $2.53 \pm 0.07$       | $1.85 \pm 0.02$         |
| Plantamajoside | $2.82 \pm 0.18$       | $2.28 \pm 0.19$         |

*High correlation between two groups a and b based on pearson correlation analysis ( $R=0.996955$ ); No significant differences between two groups based on two-tailed unpaired Student's *t*-tests ( $p=0.6127$ ).*
